# Supplementary material
Source: Springer Nature journal article supplement (https://www.springermedizin.de/resource/supplementary/13049_2012_565_MOESM1_ESM.pdf/9666828)

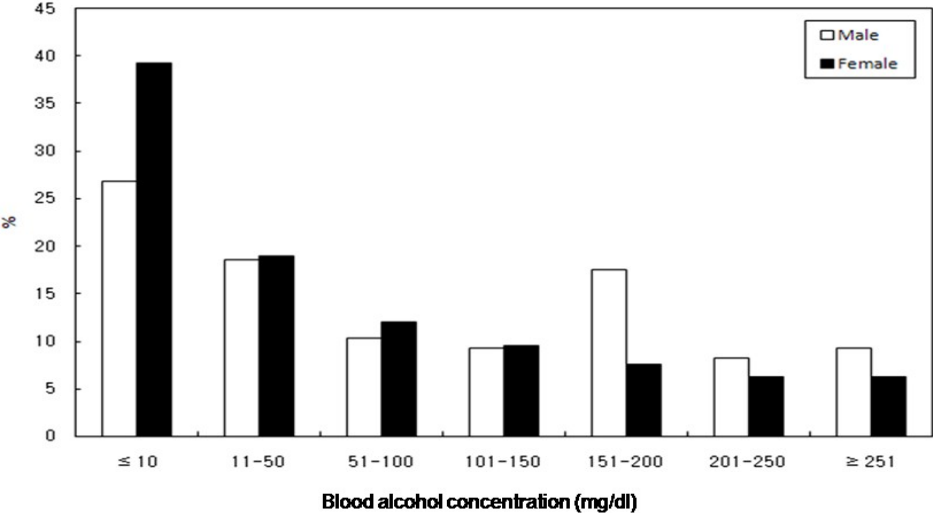

Supplement: MOESM1 [file 9666828]
